# Supplementary material
Source: PubMed Central journal article supplement (PMC7225049)
Supplement: NIHMS1541532-supplement-1.pdf [file NIHMS1541532-supplement-1.pdf]

**Supplemental Table 1.** Odds ratio (OR) [95% confidence interval (CI)] for the association of sleep quality [a single item from the Pittsburgh Sleep Quality Index (PSQI)] or restless sleep [a single item from the Center for Epidemiology Study of Depression (CES-D)] with knee pain worsening stratified by number of painful joint sites of baseline widespread pain status

|                                   | Sleep quality in past week in the PSQI |                   |                   | p-trend |
|-----------------------------------|----------------------------------------|-------------------|-------------------|---------|
|                                   | 0,1=Poor (Referent group)              | 2=Fairly good     | 3 =Very good      |         |
| Widespread pain absence (N=2746)  |                                        |                   |                   |         |
| Pain sites $\leq$ 2 (N=1562)      |                                        |                   |                   |         |
| Knee (n/N) <sup>1</sup>           | 20/142 (14.1%)                         | 140/778 (18.0%)   | 88/642 (13.7%)    |         |
| OR (95% CI) <sup>2</sup>          | 1.0 (ref)                              | 1.46 (0.79, 2.68) | 1.06 (0.56, 2.01) | 0.36    |
| Pain sites >2 (N=1184)            |                                        |                   |                   |         |
| Knee (n/N)                        | 67/216 (31.0%)                         | 164/698 (23.5%)   | 71/270 (26.3%)    |         |
| OR (95% CI)                       | 1.0 (ref)                              | 0.69 (0.45, 1.05) | 0.74 (0.45, 1.23) | 0.34    |
| Widespread pain presence (N=1912) |                                        |                   |                   |         |
| Pain sites $\leq$ 8 (N=992)       |                                        |                   |                   |         |
| Knee (n/N)                        | 63/176 (35.8%)                         | 197/624 (31.6%)   | 46/192 (23.9%)    |         |
| OR (95% CI)                       | 1.0 (ref)                              | 0.84 (0.54, 1.35) | 0.56 (0.31, 1.00) | 0.045   |
| Pain sites >8 (N=920)             |                                        |                   |                   |         |
| Knee (n/N)                        | 113/294 (38.4%)                        | 162/492 (32.9%)   | 41/134 (30.6%)    |         |
| OR (95% CI)                       | 1.0                                    | 0.62 (0.42, 0.91) | 0.51 (0.29, 0.90) | 0.01    |

|                                          | <b>Restless sleep in past week in the CES-D</b> |                   |                   | p-trend |
|------------------------------------------|-------------------------------------------------|-------------------|-------------------|---------|
|                                          | More than 3-4 days<br>(Referent group)          | 1-2 days          | < 1 day           |         |
| <b>Widespread pain absence (N=2746)</b>  |                                                 |                   |                   |         |
| Pain sites $\leq 2$ (N=1562)             |                                                 |                   |                   |         |
| Knee (n/N)                               | 15/168 (8.9%)                                   | 17/634 (18.5%)    | 116/760 (15.3%)   |         |
| OR (95% CI)                              | 1.0 (ref)                                       | 2.48 (1.29, 4.74) | 2.04 (1.04, 4.00) | 0.36    |
| Pain sites $> 2$ (N=1184)                |                                                 |                   |                   |         |
| Knee (n/N)                               | 66/266 (24.8%)                                  | 136/540 (25.2%)   | 100/378 (26.5%)   |         |
| OR (95% CI)                              | 1.0 (ref)                                       | 1.12 (0.74, 1.71) | 1.13 (0.72, 1.77) | 0.63    |
| <b>Widespread pain presence (N=1912)</b> |                                                 |                   |                   |         |
| Pain sites $\leq 8$ (N=992)              |                                                 |                   |                   |         |
| Knee (n/N)                               | 90/260 (34.6%)                                  | 133/440 (30.2%)   | 83/292 (28.4%)    |         |
| OR (95% CI)                              | 1.0 (ref)                                       | 0.83 (0.56, 1.23) | 0.76 (0.48, 1.19) | 0.24    |
| Pain sites $> 8$ (N=920)                 |                                                 |                   |                   |         |
| Knee (n/N)                               | 132/358 (36.9%)                                 | 110/340 (32.4%)   | 74/222 (33.3%)    |         |
| OR (95% CI)                              | 1.0 (ref)                                       | 0.71 (0.48, 1.05) | 0.69 (0.43, 1.10) | 0.10    |

<sup>1</sup> Number of knees: n (knees with pain worsening or incident joint pain) / N (total number of knees)

<sup>2</sup> Model adjusted for age (years), sex (men vs. women), race (white vs. non-white), study site, BMI (kg/m<sup>2</sup>), education level (college and above vs. below college), tobacco use (pack-years), Charlson's comorbidity index (range 0-9), fatigue (10-point scale), CES-D depression indicator (yes, no), and prescription use of NSAIDs (yes, no).
